# Supplementary material for: Overview of SNPs Associated with Trans Fat Content in Cow’s Milk
Source: MDPI journal article supplement (doi:10.3390/agriculture13061151), 2023-05-30
Supplement: s1 [file s1]

Archive with 1 entries (1 files):
- agriculture-2326849-supplementary.pdf
